# Supplementary material for: First-principles-based kinetic Monte Carlo simulations of CO oxidation on catalytic Au(110) and Ag(110) surfaces
Source: Royal Society of Chemistry journal article supplement (doi:10.1039/d1cp00729g), 2021-01-01
Supplement: d1cp00729g1.pdf [file d1cp00729g1.pdf]

# Supporting Information

## **First-Principles-Based Kinetic Monte Carlo Simulations of CO oxidation on catalytic Au(110) and Ag(110) surfaces**

*José L. C. Fajin<sup>‡\*</sup>, Ana S. Moura and M. Natália D. S. Cordeiro<sup>‡\*</sup>*

<sup>‡</sup> LAQV@REQUIMTE, Departamento de Química e Bioquímica, Faculdade de Ciências, Universidade do Porto, P-4169-007 Porto, Portugal

\*Corresponding Authors. E-mails: [jfajin@fc.up.pt](mailto:jfajin@fc.up.pt) / [ncordeir@fc.up.pt](mailto:ncordeir@fc.up.pt) Phone: +351 220 402 552. Fax: +351 220 402 659

**INCAR file used for the geometry optimization of CO on Ag(110)  
through DFT calculations:**

Test Ag(110)

Start parameters for this run

NWRITE = 2  
ISTART = 0  
GGA = 91  
PREC = high  
ENCUT = 415.0

Electronic Relaxation

EDIFF = 0.1E-06  
EDIFFG = -0.001  
LREAL = Auto

Ionic relaxation

IBRION = 2  
ISIF = 2  
NSW = 400  
POTIM = 0.05  
ISPIN = 2

Electronic relaxation 2 (details)

ALGO = FAST

DOS related values:

ISMEAR = 0 ; SIGMA = 0.01  
EMIN = -15 ; EMAX = 0

Write flags

LWAVE = F do not write WAVECAR  
LCHARG = F do not write CHGCAR

**POSCAR (CONTCAR) file used for the geometry optimization of CO  
on Ag(110) through DFT calculations:**

Ag(110)

1.00744422890398  
5.8322200000000004 0.0000000000000000 0.0000000000000000  
0.0000000000000000 8.2479999999999993 0.0000000000000000  
0.0000000000000000 0.0000000000000000 20.0000000000999982

C O Ag  
1 1 16

Selective dynamics

Direct

|                     |                     |                    |   |   |   |
|---------------------|---------------------|--------------------|---|---|---|
| 0.4962386221030325  | 0.7507326511565935  | 0.3016874420923117 | T | T | T |
| 0.4955925759446806  | 0.7516115935239577  | 0.3592762869572122 | T | T | T |
| 0.7517251443952352  | 0.7500072619527761  | 0.2173090337374005 | T | T | T |
| 0.0000000000000000  | 0.0000000000000000  | 0.0000000000000000 | F | F | F |
| 0.4999811392574358  | 0.0000000000000000  | 0.0000000000000000 | F | F | F |
| 0.0000000000000000  | 0.5000000000000000  | 0.0000000000000000 | F | F | F |
| 0.4999811392574358  | 0.5000000000000000  | 0.0000000000000000 | F | F | F |
| 0.2499905696287144  | 0.2500000000000000  | 0.0728999999996347 | F | F | F |
| 0.7499717088861502  | 0.2500000000000000  | 0.0728999999996347 | F | F | F |
| 0.2499905696287144  | 0.7500000000000000  | 0.0728999999996347 | F | F | F |
| 0.7499717088861502  | 0.7500000000000000  | 0.0728999999996347 | F | F | F |
| -0.0004999207962698 | -0.0022824485014823 | 0.1493404586470423 | T | T | T |
| 0.4996236164400201  | 0.0012720687248133  | 0.1461611198243354 | T | T | T |
| -0.0004949040425780 | 0.5023375743687787  | 0.1493358270841700 | T | T | T |
| 0.4996294552940754  | 0.4987725602537054  | 0.1461496111238449 | T | T | T |
| 0.2485440905636731  | 0.2500573365230593  | 0.2139299736590298 | T | T | T |
| 0.7504594685959893  | 0.2500555177081815  | 0.2139675662608982 | T | T | T |
| 0.2455278922712394  | 0.7500118319883584  | 0.2170259553709728 | T | T | T |

**POSCAR (CONTCAR) file used for the geometry optimization of O<sub>2</sub>  
on Ag(110) through DFT calculations:**

Ag(110)

1.007444228903977

5.8322200000000000 0.0000000000000000 0.0000000000000000  
0.0000000000000000 8.2479999999999990 0.0000000000000000  
0.0000000000000000 0.0000000000000000 20.0000000001000000

O Ag

2 16

Selective dynamics

Direct

|                    |                    |                    |   |   |   |
|--------------------|--------------------|--------------------|---|---|---|
| 0.3728566589046079 | 0.4996492356895919 | 0.2708012579892363 | T | T | T |
| 0.6205924473114957 | 0.4996362738951442 | 0.2707739538571619 | T | T | T |
| 0.7503791933151681 | 0.7347248293629201 | 0.2163233057211892 | T | T | T |
| 0.0000000000000000 | 0.0000000000000000 | 0.0000000000000000 | F | F | F |
| 0.4999811392574358 | 0.0000000000000000 | 0.0000000000000000 | F | F | F |
| 0.0000000000000000 | 0.5000000000000000 | 0.0000000000000000 | F | F | F |
| 0.4999811392574358 | 0.5000000000000000 | 0.0000000000000000 | F | F | F |
| 0.2499905696287144 | 0.2500000000000000 | 0.0728999999996347 | F | F | F |
| 0.7499717088861502 | 0.2500000000000000 | 0.0728999999996347 | F | F | F |
| 0.2499905696287144 | 0.7500000000000000 | 0.0728999999996347 | F | F | F |
| 0.7499717088861502 | 0.7500000000000000 | 0.0728999999996347 | F | F | F |
| 0.9994094059659201 | 0.9997821804965286 | 0.1566170287898145 | T | T | T |
| 0.4995100834321814 | 0.9998832718213897 | 0.1531803822103046 | T | T | T |
| 0.9994537089150642 | 0.4999634114783213 | 0.1408026174531850 | T | T | T |
| 0.4996106735609010 | 0.4999400734476789 | 0.1385244449248386 | T | T | T |
| 0.2470349915720008 | 0.2645651758309730 | 0.2162102854233024 | T | T | T |
| 0.7504165370213682 | 0.2647788353793024 | 0.2162746712925508 | T | T | T |
| 0.2471544043867646 | 0.7351102421816766 | 0.2162846160010979 | T | T | T |

## INCAR file used to run DIMER calculations:

Optimization

Start parameters for this run

```
ISTART = 0  
ISPIN = 2  
GGA = 91
```

# Electronic Relaxation

```
ENCUT = 415.0  
IBRION=3  
EDIFF = 1E-06  
EDIFFG=-0.001  
POTIM=0.0  
ISYM=0  
NSW=900  
PREC=High  
LREAL=.FALSE.  
LWAVE=.FALSE.  
LCHARG=.FALSE.
```

# DIMER PARAMETERS

```
ICHAIN=2  
DdR=0.005  
DRotMax=4  
DFNMin=0.01  
DFNMax=1.0
```

# OPTIMIZER PARAMETERS

```
IOPT=2
```

**POSCAR (CONTCAR) file used for the search of the TS structure for the O<sub>2</sub> dissociation:**

```
Ag110
1.00744422890398
 5.8322200000000004 0.0000000000000000 0.0000000000000000
 0.0000000000000000 8.2479999999999993 0.0000000000000000
 0.0000000000000000 0.0000000000000000 20.0000000009999982
O Ag
2 16
Selective dynamics
Direct
0.4999701584191386 0.4134881524424994 0.2442110260855010 T T T
0.4999643758119373 0.6380929416662361 0.2768671901171664 T T T
0.0000000000000000 0.0000000000000000 0.0000000000000000 F F F
0.4999811392574358 0.0000000000000000 0.0000000000000000 F F F
0.0000000000000000 0.5000000000000000 0.0000000000000000 F F F
0.4999811392574358 0.5000000000000000 0.0000000000000000 F F F
0.2499905696287143 0.2500000000000000 0.0728999999996347 F F F
0.7499717088861502 0.2500000000000000 0.0728999999996347 F F F
0.2499905696287143 0.7500000000000000 0.0728999999996347 F F F
0.7499717088861502 0.7500000000000000 0.0728999999996347 F F F
0.9999740377161110 0.9952103048046119 0.1493958635840936 T T T
0.4999772568031318 0.9989049247552454 0.1477407928791213 T T T
0.9999788610247544 0.5002064844099162 0.1441152022467704 T T T
0.4999784330751861 0.5062449197550146 0.1403396216060653 T T T
0.2376828033658569 0.2426412393176277 0.2157725793188580 T T T
0.7622673326367826 0.2426437013244918 0.2157725123269411 T T T
0.2405863834658549 0.7503799846586369 0.2183793328862484 T T T
0.7593530344673876 0.7503771069183887 0.2183798090370821 T T T
```

---

**To run the kMC simulations using the kmos code please see the  
GitHub site: <https://github.com/mhoffman/kmos>**
